# Supplementary material
Source: PubMed Central journal article supplement (PMC3081203)

**A**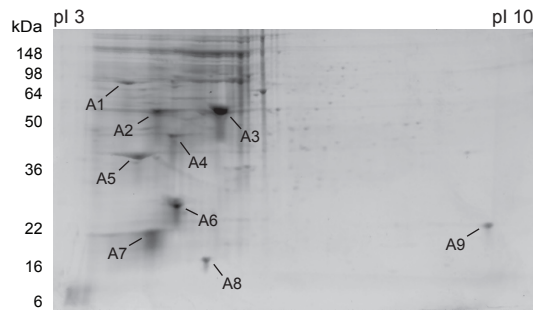

A1: NUCL  
 A2: SET, HNRCL, HNRNPC, PURA  
 A3: NMP  
 A4: C1BPQ  
 A5: AN32A, AN32B  
 A6: RL26L  
 A7: H2B1A, H2B1B  
 A8: RUXF  
 A9: SSB

Eluting from DS with 0.4 M-0.6 M NaCl

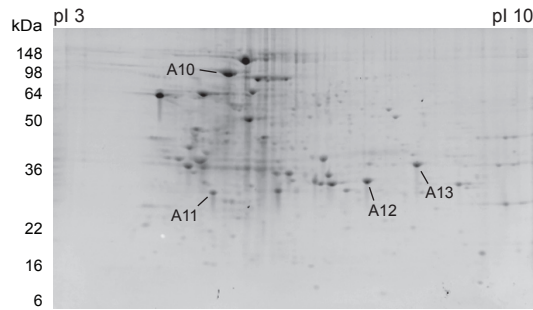

A10: GRP78  
 A11: PSB6  
 A12: Q53GF5  
 A13: PSA4

Eluting from DS with 0.2 M-0.4 M NaCl

**B**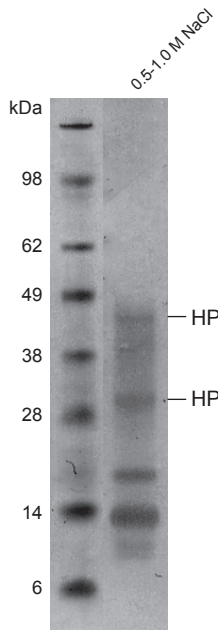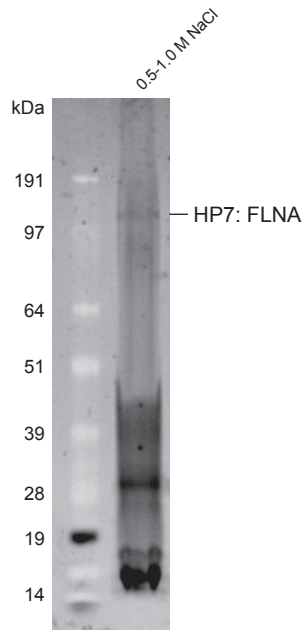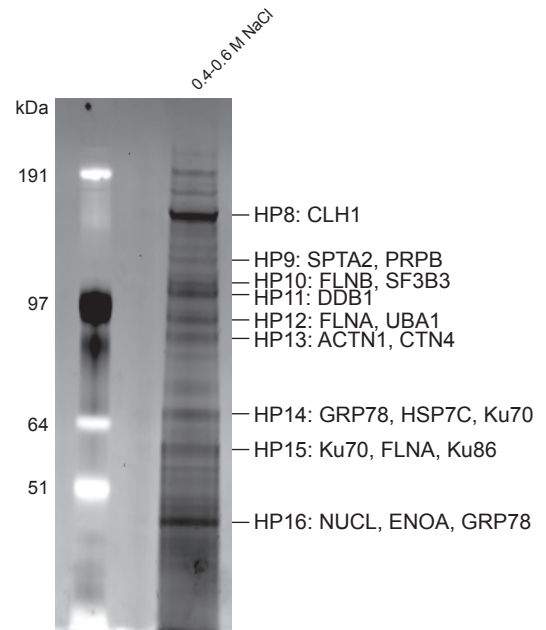

Supplement: mmc4.pdf [file mmc4.pdf]
