# Supplementary material
Source: PubMed Central journal article supplement (PMC3081203)

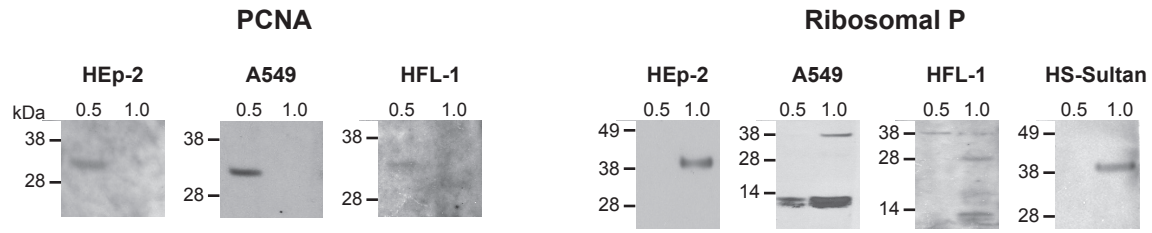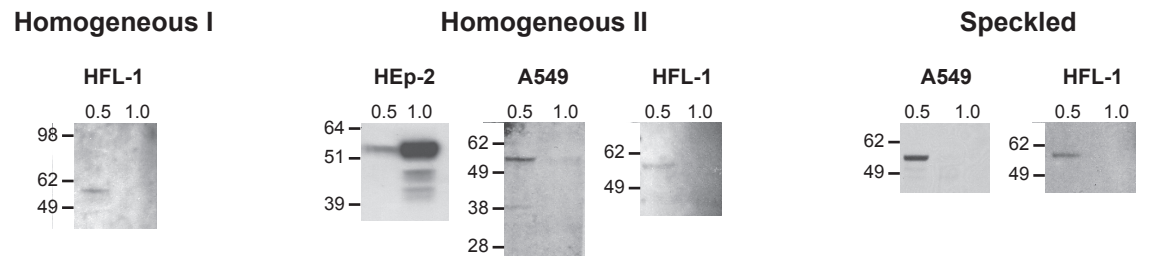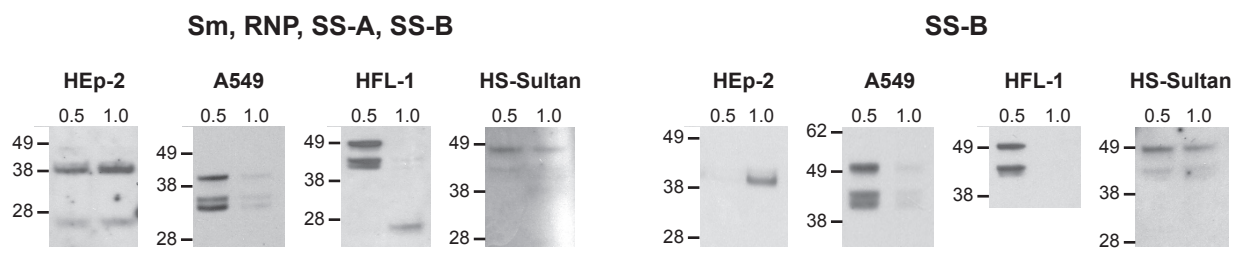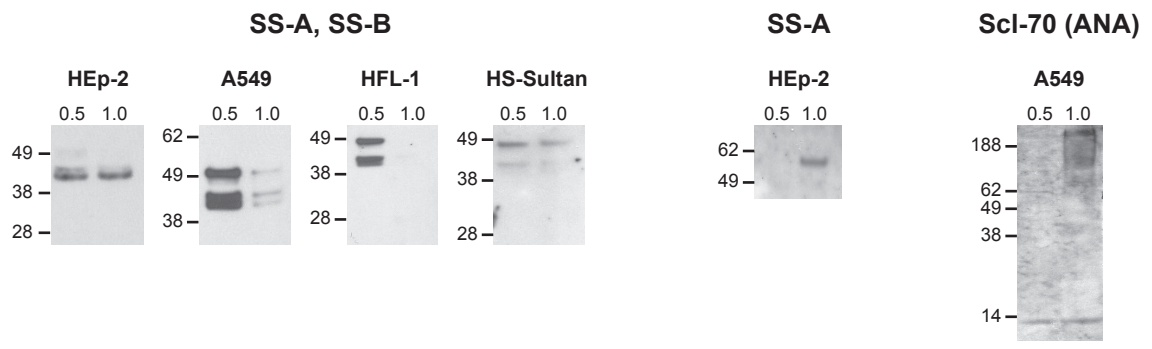

Suppl. Fig. S1 - Rho et al.

Supplement: mmc1.pdf [file mmc1.pdf]

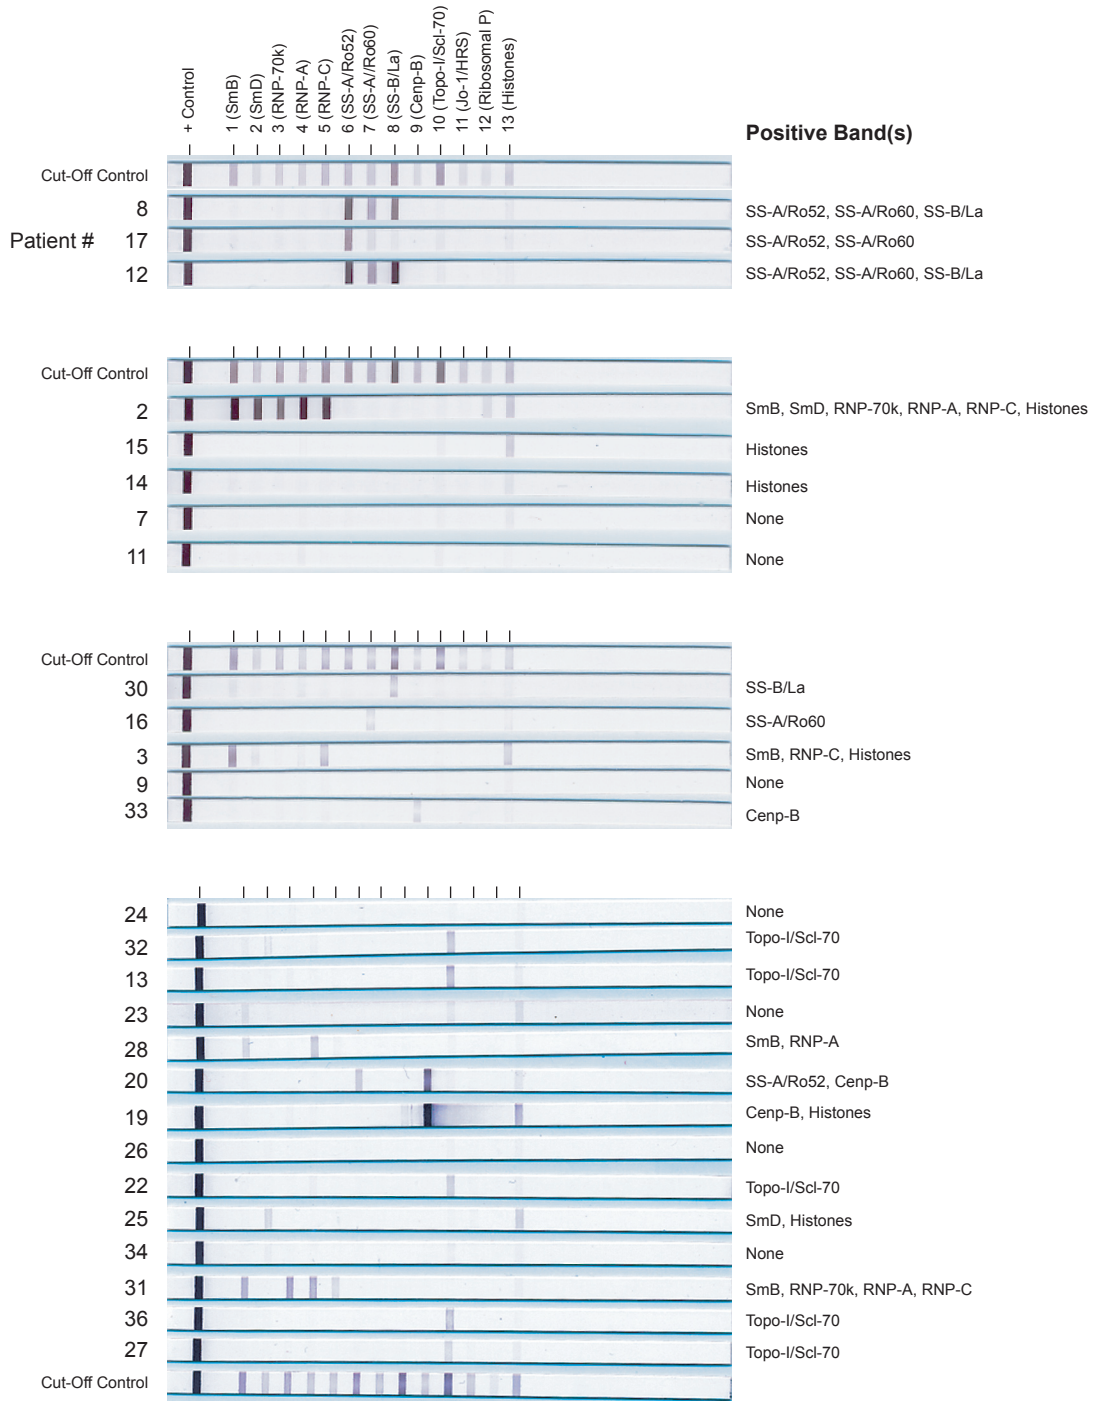

Suppl. Fig. S2 - Rho et al.

Supplement: mmc2.pdf [file mmc2.pdf]

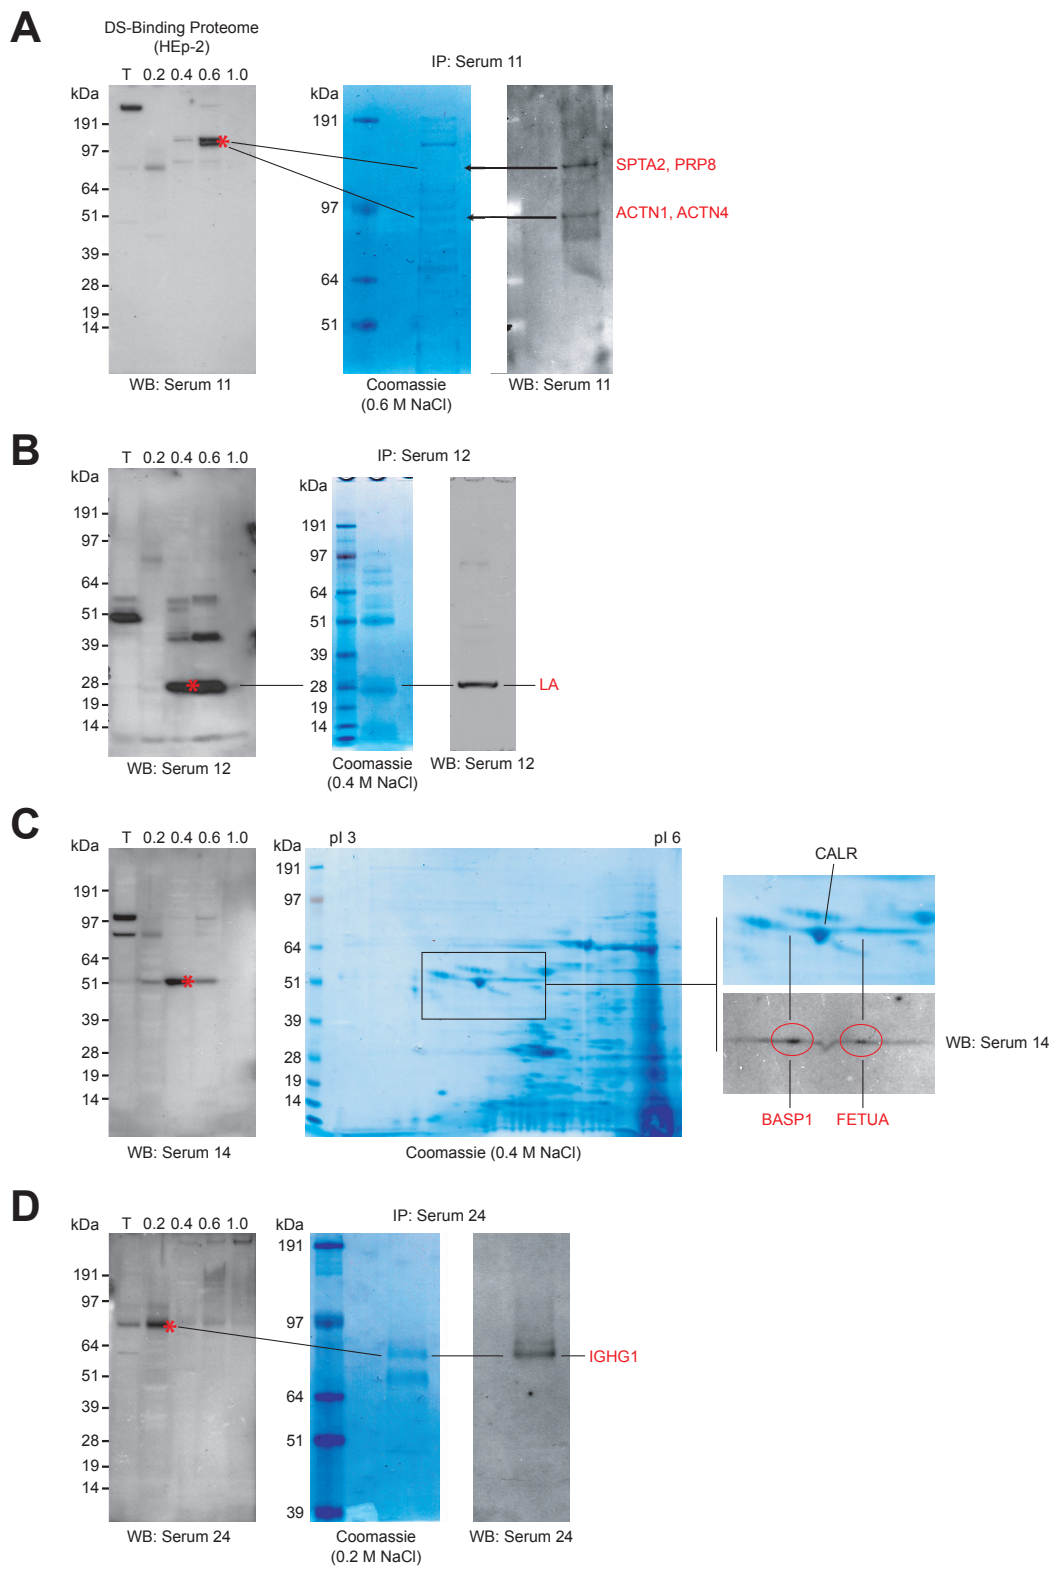

Suppl. Fig. S3 - Rho et al.

Supplement: mmc3.pdf [file mmc3.pdf]

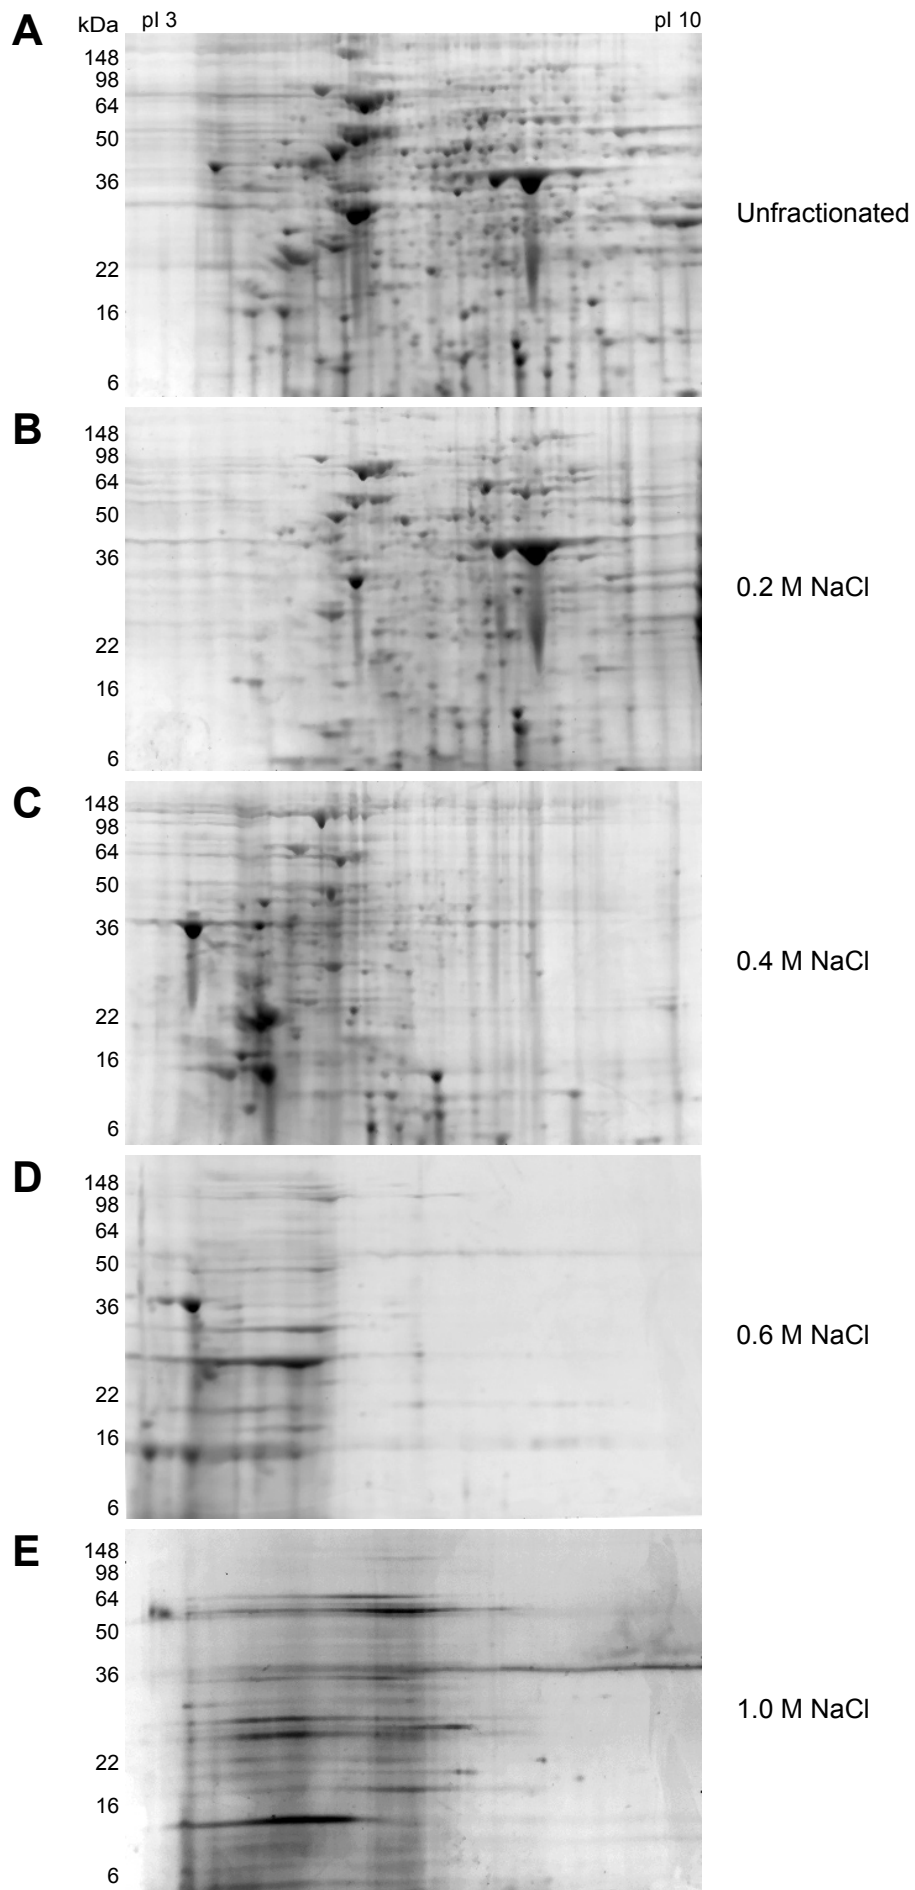

Suppl. Fig. S5 - Rho et al.

Supplement: mmc5.pdf [file mmc5.pdf]

**A**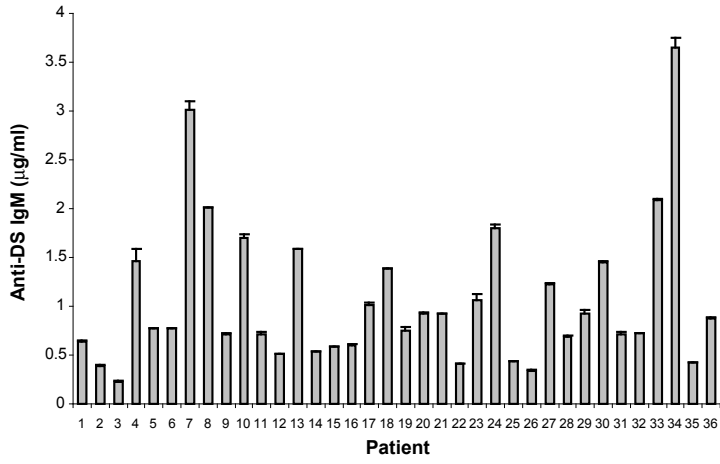**B**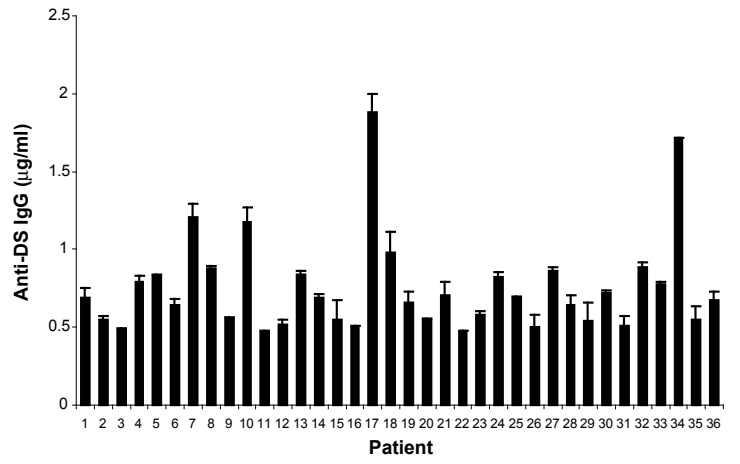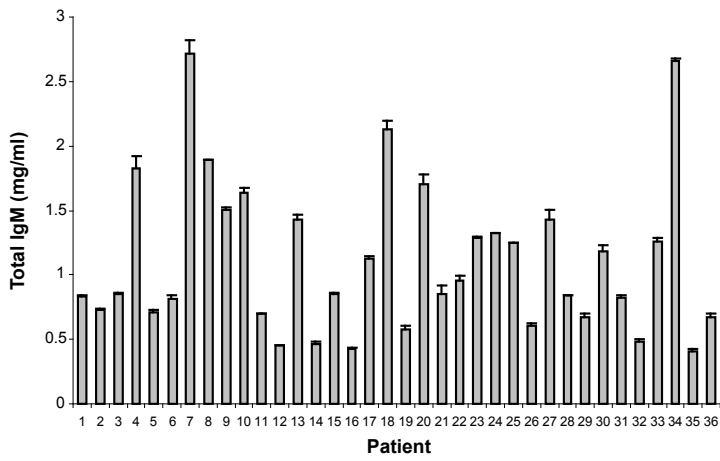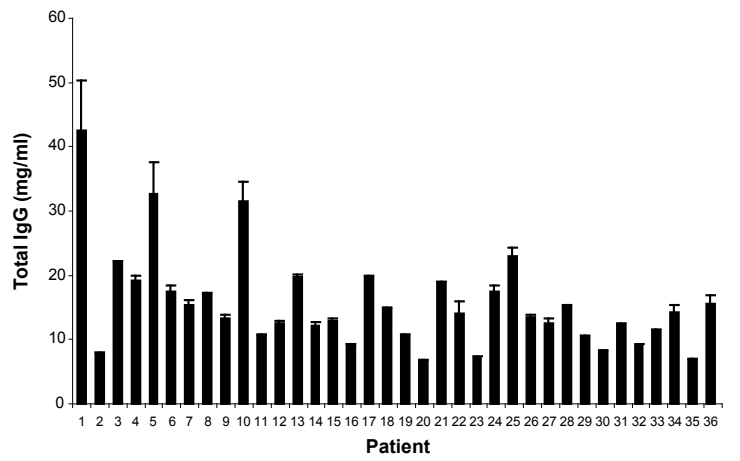

Fig. S6 - Rho et al.

Supplement: mmc6.pdf [file mmc6.pdf]
